# Supplementary material
Source: Springer Nature journal article supplement (https://www.springermedizin.de/resource/supplementary/12958_2010_688_MOESM8_ESM.pdf/9568590)
Supplement: MOESM8 [file 9568590]

**Table 1:**

| <b>Patient no.</b> | <b>Age</b> | <b>Menopausal status</b> | <b>Grade</b> | <b>%MI</b> |
|--------------------|------------|--------------------------|--------------|------------|
| 1                  | 65         | Post                     | 1            | 0          |
| 2                  | 56         | Post                     | 1            | 29         |
| 3                  | 84         | Post                     | 1            | 80         |
| 4                  | 34         | UK                       | 1            | 0          |
| 5                  | 78         | Post                     | 1            | 4          |
| 6                  | 73         | Post                     | 2            | 38         |
| 7                  | 52         | UK                       | 2            | UK         |
| 8                  | 60         | Post                     | 2            | 18         |
| 9                  | 88         | Post                     | 2            | 73         |
| 10                 | 63         | Post                     | 2            | 100        |
| 11                 | 54         | Post                     | 3            | 38         |
| 12                 | 59         | Post                     | 3            | 33         |
| 13                 | 77         | Post                     | 3            | 25         |
| 14                 | UK         | UK                       | 3            | UK         |
| 15                 | 68         | Post                     | 3            | 13         |
| 16                 | 55         | UK                       | 3            | 77         |

Pre: pre-menopausal; post: post-menopausal; per: peri-menopausal; UK: unknown; %MI: % myometrial invasion.
